# Supplementary material for: Highly pH-dependent synthesis of two novel three-dimensional dysprosium complexes with interesting magnetic and luminescence properties
Source: Royal Society of Chemistry journal article supplement (doi:10.1039/c4ce02023e), 2014-11-24
Supplement: c4ce02023e1.pdf [file c4ce02023e1.pdf]

## *Supporting information for*

### **Highly pH-dependent synthesis of two novel three-dimensional dysprosium complexes with interesting magnetic and luminescent properties**

**Lina Zhang,<sup>a,b</sup> Shuting Lu,<sup>a</sup> Chao Zhang,<sup>a</sup> Chenxia Du,<sup>\*a</sup> and Hongwei Hou<sup>\*a</sup>**

<sup>a</sup>*College of Chemistry and Molecular Engineering, Zhengzhou University, Zhengzhou 450052, P. R. China*

<sup>b</sup>*College of Physics and Chemistry, Henan Polytechnic University, Jiaozuo 454003, P. R. China*

\*Author for correspondence: E-mail: [dcx@zzu.edu.cn](mailto:dcx@zzu.edu.cn); [houghongw@zzu.edu.cn](mailto:houghongw@zzu.edu.cn)

**Table S1** Selected bond lengths (Å) and angles (°) for compounds 1–2

| Compound 1                                 |           |                                 |           |
|--------------------------------------------|-----------|---------------------------------|-----------|
| Dy(1)–O(1) <sup>1</sup>                    | 2.396(2)  | Dy(2)–O(5)                      | 2.347(2)  |
| Dy(1)–O(2) <sup>1</sup>                    | 2.488(2)  | Dy(2)–O(8)                      | 2.320(2)  |
| Dy(1)–O(4)                                 | 2.298(2)  | Dy(2)–O(11) <sup>2</sup>        | 2.355(2)  |
| Dy(1)–O(7)                                 | 2.337(2)  | Dy(2)–O(13) <sup>3</sup>        | 2.432(2)  |
| Dy(1)–O(10) <sup>2</sup>                   | 2.286(2)  | Dy(2)–O(14) <sup>3</sup>        | 2.476(2)  |
| Dy(1)–O(17)                                | 2.344(3)  | Dy(2)–O(16)                     | 2.314(2)  |
| Dy(1)–O(20W)                               | 2.449(2)  | Dy(2)–O(19)                     | 2.347(3)  |
| Dy(1)–O(21W)                               | 2.420(3)  | Dy(2)–O(22W)                    | 2.476(3)  |
| O(1) <sup>1</sup> –Dy(1)–O(2) <sup>1</sup> | 53.35(8)  | O(14) <sup>3</sup> –Dy(2)–O(22) | 115.14(9) |
| O(1) <sup>1</sup> –Dy(1)–O(20)             | 75.89(8)  | O(5)–Dy(2)–O(13) <sup>3</sup>   | 82.54(9)  |
| O(1) <sup>1</sup> –Dy(1)–O(21)             | 84.58(9)  | O(5)–Dy(2)–O(14) <sup>3</sup>   | 71.31(8)  |
| O(4)–Dy(1)–O(1) <sup>1</sup>               | 144.98(9) | O(5)–Dy(2)–O(19)                | 140.13(9) |
| O(4)–Dy(1)–O(2) <sup>1</sup>               | 141.99(8) | O(5)–Dy(2)–O(22)                | 140.66(9) |
| O(4)–Dy(1)–O(7)                            | 80.88(9)  | O(8)–Dy(2)–O(5)                 | 76.50(9)  |
| O(4)–Dy(1)–O(17)                           | 128.59(9) | O(8)–Dy(2)–O(13) <sup>3</sup>   | 130.98(8) |
| O(4)–Dy(1)–O(20)                           | 69.86(9)  | O(8)–Dy(2)–O(14) <sup>3</sup>   | 78.40(8)  |

| O(4)–Dy(1)–O(21)                            | 77.72(9)   | O(8)–Dy(2)–O(19)                           | 80.02(9)   |
|---------------------------------------------|------------|--------------------------------------------|------------|
| <b>Compound 2</b>                           |            |                                            |            |
| Dy(1)–O(2)                                  | 2.364(3)   | Dy(2)–O(1)                                 | 2.324(3)   |
| Dy(1)–O(4) <sup>1</sup>                     | 2.343(3)   | Dy(2)–O(4) <sup>1</sup>                    | 2.676(3)   |
| Dy(1)–O(7)                                  | 2.345(3)   | Dy(2)–O(5) <sup>1</sup>                    | 2.399(3)   |
| Dy(1)–O(11) <sup>2</sup>                    | 2.404(3)   | Dy(2)–O(8)                                 | 2.334(3)   |
| Dy(1)–O(16) <sup>3</sup>                    | 2.454(3)   | Dy(2)–O(10) <sup>2</sup>                   | 2.269(3)   |
| Dy(1)–O(17) <sup>3</sup>                    | 2.427(3)   | Dy(2)–O(14)                                | 2.296(3)   |
| Dy(1)–O(19)                                 | 2.366(3)   | Dy(2)–O(20)                                | 2.325(4)   |
| Dy(1)–O(21W)                                | 2.396(3)   | Dy(2)–O(22W)                               | 2.376(3)   |
| O(2)–Dy(1)–O(10) <sup>2</sup>               | 65.86(9)   | O(1)–Dy(2)–O(4) <sup>1</sup>               | 71.51(9)   |
| O(2)–Dy(1)–O(11) <sup>2</sup>               | 78.77(11)  | O(1)–Dy(2)–O(5) <sup>1</sup>               | 83.42(11)  |
| O(2)–Dy(1)–O(16) <sup>3</sup>               | 141.41(10) | O(1)–Dy(2)–O(8)                            | 138.03(10) |
| O(2)–Dy(1)–O(17) <sup>3</sup>               | 146.37(11) | O(1)–Dy(2)–O(20)                           | 130.43(14) |
| O(2)–Dy(1)–O(19)                            | 74.74(11)  | O(1)–Dy(2)–O(22)                           | 131.89(11) |
| O(2)–Dy(1)–O(21)                            | 75.25(10)  | O(5) <sup>1</sup> –Dy(2)–O(4) <sup>1</sup> | 50.61(10)  |
| O(4) <sup>1</sup> –Dy(1)–O(2)               | 77.04(10)  | O(8)–Dy(2)–O(4) <sup>1</sup>               | 70.05(10)  |
| O(4) <sup>1</sup> –Dy(1)–O(7)               | 71.00(10)  | O(8)–Dy(2)–O(5) <sup>1</sup>               | 85.09(11)  |
| O(4) <sup>1</sup> –Dy(1)–O(10) <sup>2</sup> | 73.79(10)  | O(8)–Dy(2)–O(22)                           | 75.60(11)  |

Symmetry transformations used to generate equivalent atoms in complex **1**: <sup>1</sup>-x, 1/2+y, 1/2-z; <sup>2</sup>-1+x, 1/2-y, -1/2+z; <sup>3</sup>1-x, -1/2+y, 1/2-z; and complex **2**: <sup>1</sup>-1/2+x, 3/2-y, +z; <sup>2</sup>1/2+x, 1/2-y, +z; <sup>3</sup>1/2-x, -1/2+y, 1/2+z.

**Table S2** Continuous Shape Measures (CSHM's) calculated by SHAPE 2.1 for **1** and **2**.<sup>a</sup>

|                 | <b>1-Dy1</b> | <b>1-Dy2</b> | <b>2-Dy1</b> | <b>2-Dy2</b> |
|-----------------|--------------|--------------|--------------|--------------|
| <b>OP-8</b>     | 31.304       | 30.455       | 31.047       | 31.707       |
| <b>HPY-8</b>    | 22.404       | 22.498       | 22.764       | 21.692       |
| <b>HBPY-8</b>   | 15.246       | 15.656       | 14.006       | 15.347       |
| <b>CU-8</b>     | 10.908       | 11.462       | 9.621        | 10.629       |
| <b>SAPR-8</b>   | 2.557        | 1.812        | 2.795        | 3.64         |
| <b>TDD-8</b>    | <b>1.48</b>  | 1.851        | 2.081        | <b>1.955</b> |
| <b>JGBF-8</b>   | 12.769       | 14.166       | 12.763       | 12.645       |
| <b>JETBPY-8</b> | 28.367       | 27.771       | 24.555       | 24.536       |
| <b>JBTPR-8</b>  | 2.15         | 1.887        | 2.661        | 3.229        |
| <b>BTPR-8</b>   | 1.565        | <b>1.133</b> | <b>1.732</b> | 2.89         |
| <b>JSD-8</b>    | 3.65         | 3.881        | 4.641        | 3.87         |
| <b>TT-8</b>     | 11.73        | 11.947       | 10.453       | 11.152       |
| <b>ETBPY-8</b>  | 24.044       | 22.543       | 19.871       | 21.495       |

<sup>a</sup> List Of Reference Shapes:

|        |     |                     |
|--------|-----|---------------------|
| OP-8   | D8h | Octagon             |
| HPY-8  | C7v | Heptagonal pyramid  |
| HBPY-8 | D6h | Hexagonal bipyramid |

|          |     |                                            |
|----------|-----|--------------------------------------------|
| CU-8     | Oh  | Cube                                       |
| SAPR-8   | D4d | Square antiprism                           |
| TDD-8    | D2d | Triangular dodecahedron                    |
| JGBF-8   | D2d | Johnson gyrobifastigium J26                |
| JETBPY-8 | D3h | Johnson elongated triangular bipyramid J14 |
| JBTPR-8  | C2v | Biaugmented trigonal prism J50             |
| BTPR-8   | C2v | Biaugmented trigonal prism                 |
| JSD-8    | D2d | Snub diphenooid J84                        |
| TT-8     | Td  | Triakis tetrahedron                        |
| ETBPY-8  | D3h | Elongated trigonal bipyramid               |

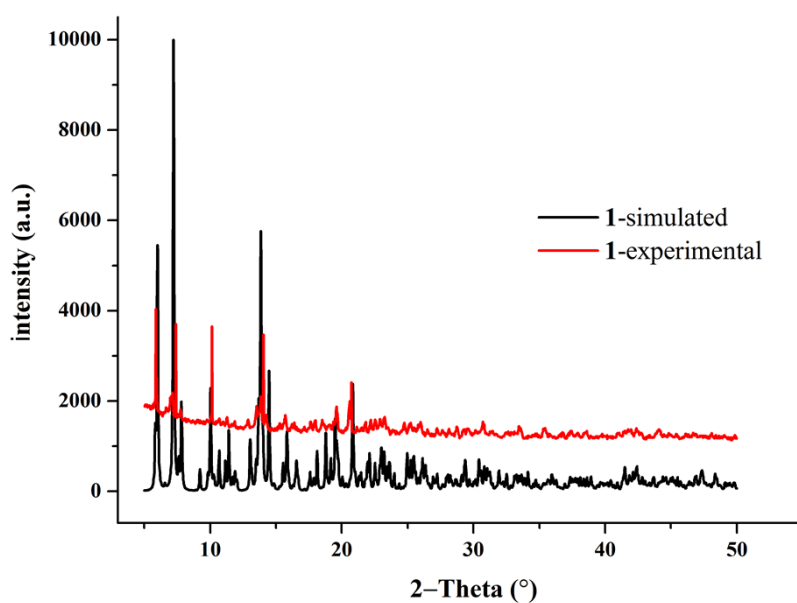

**Figure S1.** Experimental and simulated PXRD patterns for **1**.

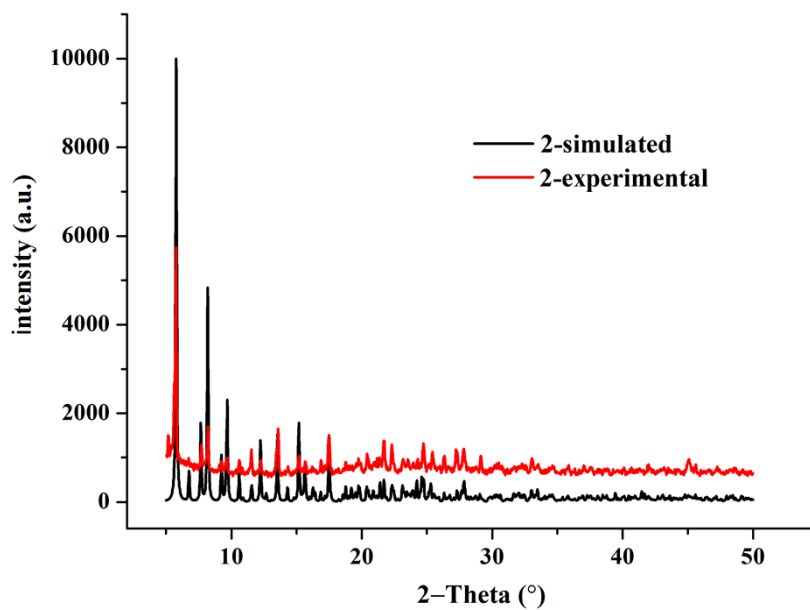

**Figure S2.** Experimental and simulated PXRD patterns for **2**.

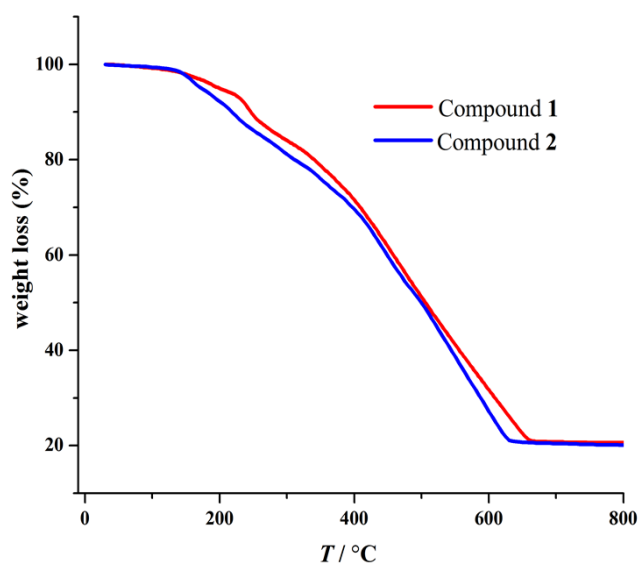

**Figure S3.** The TGA curves for compound **1** and **2**.

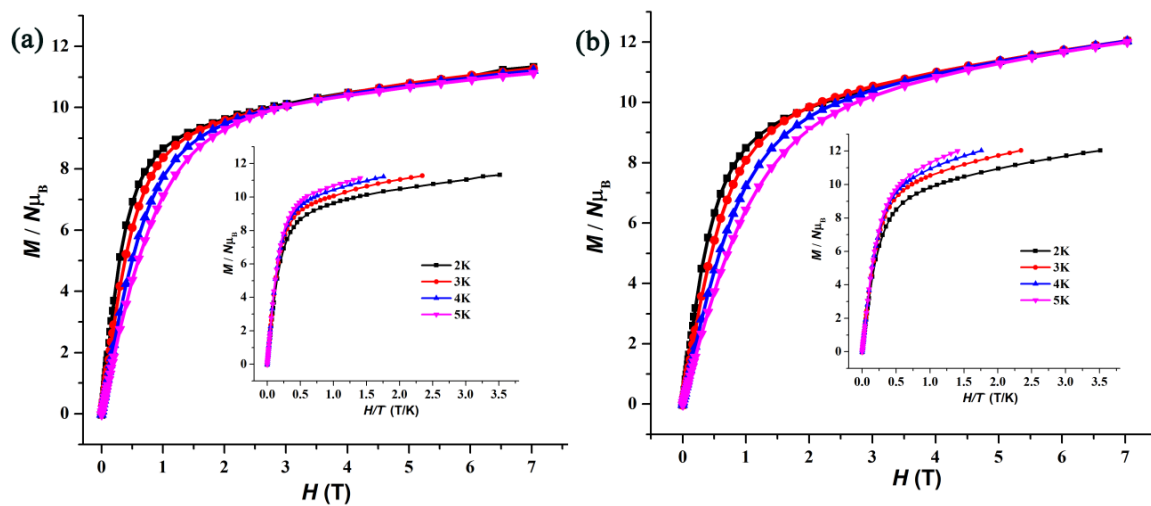

**Figure S4.** Plots of magnetization ( $M$ ) vs field ( $H$ ) for compounds **1** (a) and **2** (b) at different low temperatures. Insets:  $M$  vs  $H/T$  plots at different temperatures.
